# Supplementary material for: Olive Fruit Ripening Degree and Water Content Relationships with Phenolic Acids and Alcohols, Secoiridoids, Flavonoids and Pigments in Fruit and Oil
Source: MDPI journal article supplement (doi:10.3390/molecules28196943), 2023-10-05
Supplement: s1 [file s1]

Results

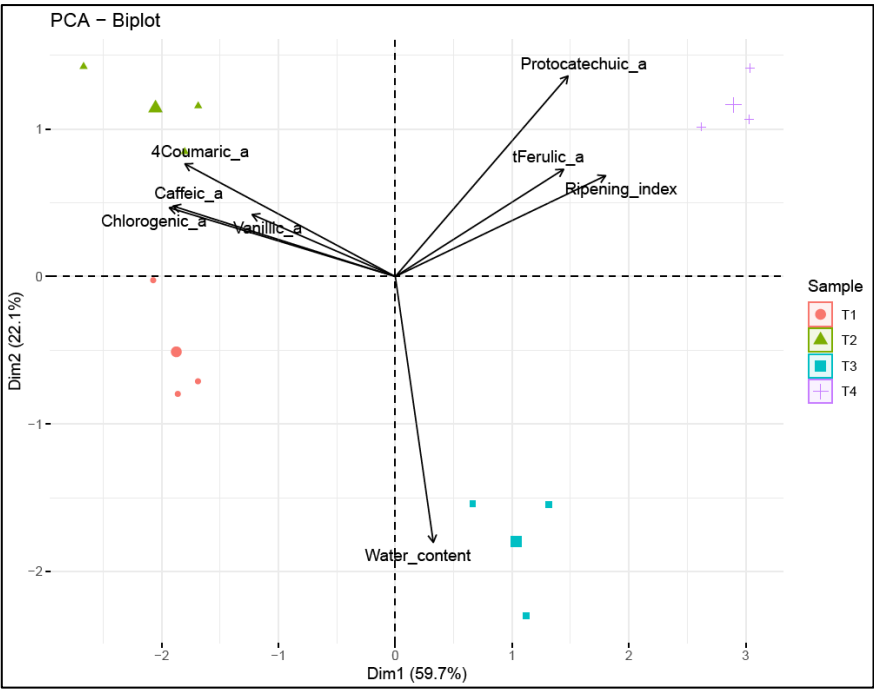

**Figure S1.** PCA Biplot of Dim1 vs Dim2 showing loadings of the scores and the variables water content, ripening index, 4-coumaric acid (4Coumaric\_a), caffeic acid (Caffeic\_a), *trans*-ferulic acid (tFerulic\_a), vanillic acid (Vanillic\_a), protocatechiuc acid (Protocatechiuc\_a), chlorogenic acid (Chlorogenic\_a), in fruits from olive ('cv Arbequina') trees subjected to T1 (●) full irrigation with tilled soil, T2 (▲) reduced irrigation with tilled soil, T3 (■) full irrigation with non-tilled soil and, T4 (✚) reduced irrigation with non-tilled soil.

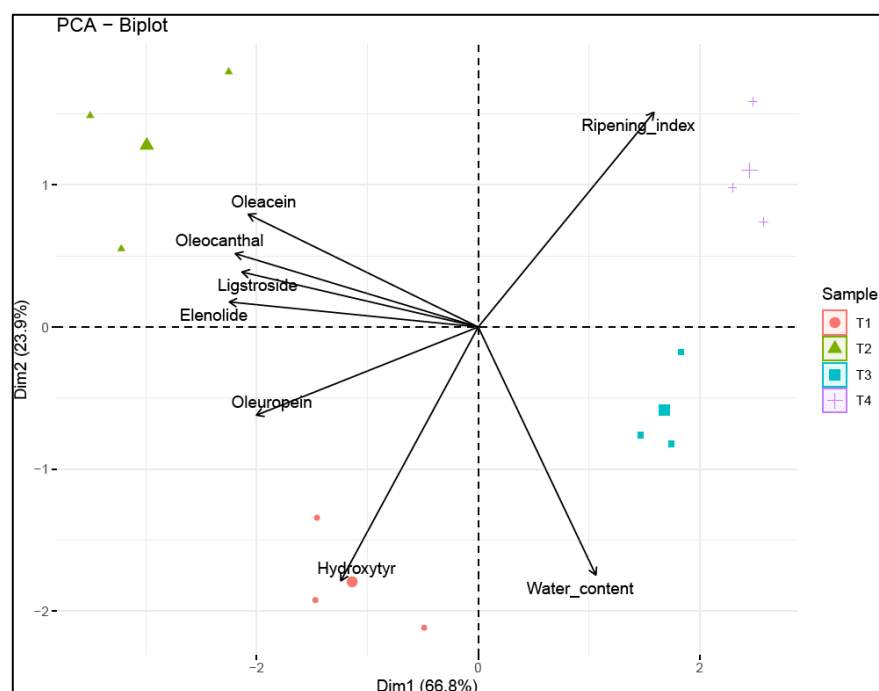

**Figure S2.** PCA Biplot for PC1 (Dim1) and PC2 (Dim2) showing loadings of the scores and the variables water content, ripening index, 3,4-DHPEA (Hydroxytyr), oleuropein, ligstroside, (monitored in fruits) 3,4-DHPEA-EDA (Oleacein), p-HPEA-EDA (Oleocanthal), and S-(E)-elenolide (monitored in oils) from olive ('cv Arbequina') trees subjected to T1 (●) full irrigation with tilled soil, T2 (●) reduced irrigation with tilled soil, T3 (●) full irrigation with non-tilled soil and, T4 (●) reduced irrigation with non-tilled soil.

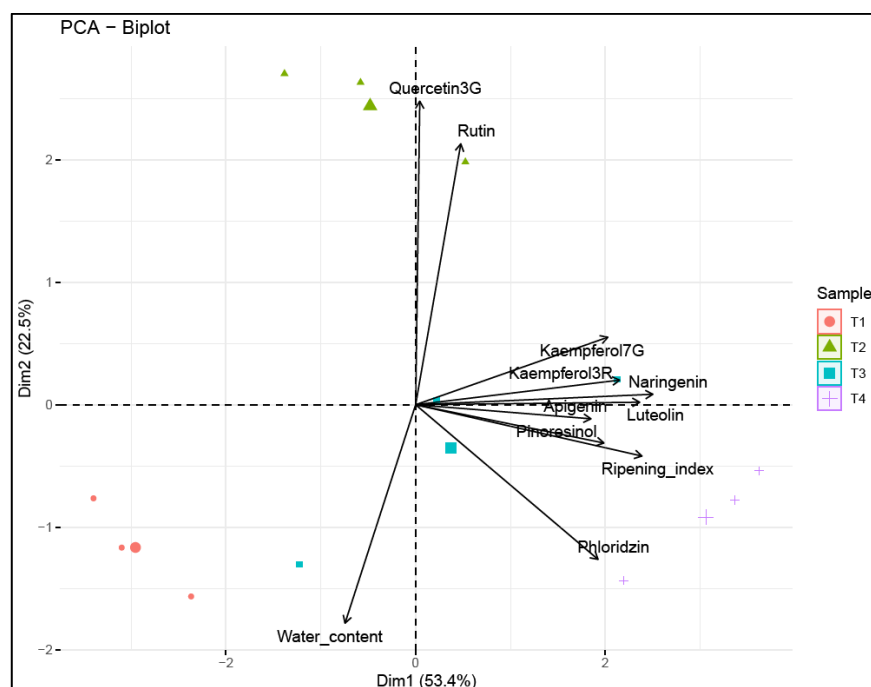

**Figure S3.** PCA Biplot for PC1 (Dim1) and PC2 (Dim2) showing loadings of the scores and the variables water content, ripening index, Rutin, Quercetin-3-O-Glucoside (Quercetin3G), pinoselin, luteolin, apigenin, naringenin, kaempferol-7-O-Glucoside (Kaempferol7G), kaempferol-3-O-Rutinoside (Kaempferol3R), phloridzin in fruits from olive ('cv Arbequina') trees subjected to T1 (●) full irrigation with tilled soil, T2 (●) reduced irrigation with tilled soil, T3 (●) full irrigation with non-tilled soil and, T4 (●) reduced irrigation with non-tilled soil.

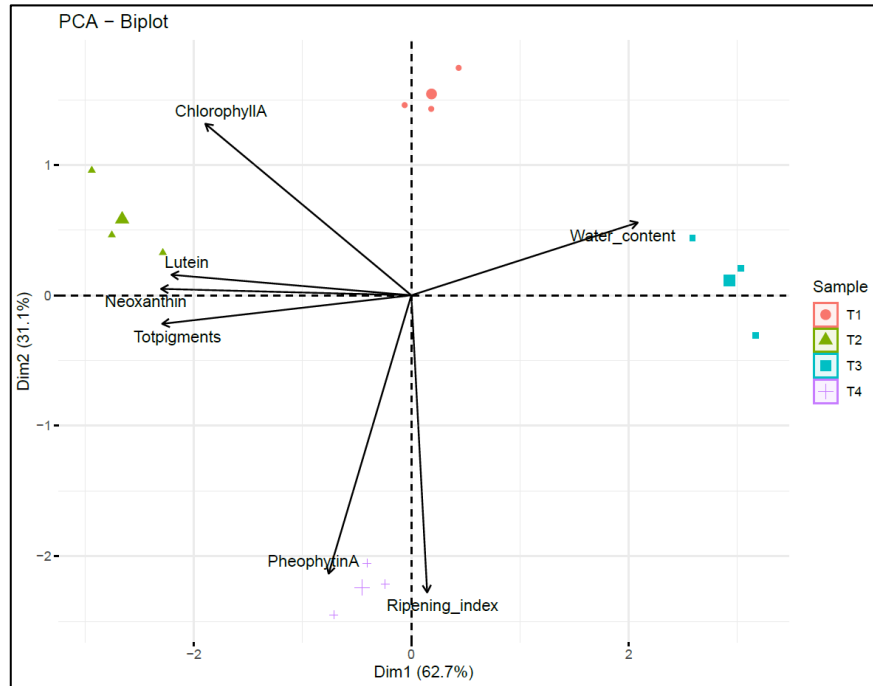

**Figure S4.** PCA Biplot for PC1 (Dim1) and PC2 (Dim2) showing loadings of the scores and the variables of water content, ripening index, lutein, 9-cis Neoxanthin (Neoxanthin), Pheophytin *a* (PheophytinA), Chlorophyll *a* (ChlorophyllA), Total pigments (Totpigments) in oils from olive ('cv Arbequina') trees subjected to T1 (●) full irrigation with tilled soil, T2 (▲) reduced irrigation with tilled soil, T3 (■) full irrigation with non-tilled soil and, T4 (⊕) reduced irrigation with non-tilled soil.

**Table S1.** Correlation table among fruit pomological traits and fruit phenolic compounds and secoiridoids (and derivatives) and pigments in the oil.

|                         | <b>Ripening_index</b> | <b>FW</b> | <b>Pulppit_ratio</b> | <b>Water_content</b> | <b>Oil_content</b> |
|-------------------------|-----------------------|-----------|----------------------|----------------------|--------------------|
| <b>Ripening_index</b>   |                       | 0.427     | -0.028               | -0.098               | 0.070              |
| <b>FW</b>               | 0.427                 |           | 0.343                | -0.350               | 0.175              |
| <b>Pulppit_ratio</b>    | -0.028                | 0.343     |                      | 0.322                | -0.224             |
| <b>Water_content</b>    | -0.098                | -0.350    | 0.322                |                      | -0.580             |
| <b>Oil_content</b>      | 0.070                 | 0.175     | -0.224               | -0.580               |                    |
| <b>Protocatechuic_a</b> | 0.734                 | 0.476     | -0.196               | -0.510               | 0.245              |
| <b>Vanillic_a</b>       | -0.483                | -0.524    | -0.643               | -0.196               | 0.448              |
| <b>Caffeic_a</b>        | -0.650                | -0.210    | 0.028                | -0.329               | 0.524              |
| <b>4Coumaric_a</b>      | -0.685                | -0.357    | -0.266               | -0.329               | 0.462              |
| <b>tFerulic_a</b>       | 0.308                 | 0.126     | -0.434               | 0.098                | 0.021              |
| <b>Chlorogenic_a</b>    | -0.671                | -0.238    | -0.056               | -0.350               | 0.399              |
| <b>Chicoric_a</b>       | 0.385                 | 0.077     | -0.231               | -0.608               | 0.545              |
| <b>Verbascoside</b>     | -0.860                | -0.336    | -0.007               | -0.077               | 0.308              |
| <b>p-HPEA</b>           | 0.291                 | 0.067     | -0.291               | -0.343               | -0.097             |
| <b>3,4-DHPEA</b>        | -0.909                | -0.371    | 0.007                | 0.126                | 0.105              |
| <b>Ligstroside</b>      | -0.552                | -0.238    | 0.049                | -0.371               | 0.308              |
| <b>Oleuropein</b>       | -0.769                | -0.378    | -0.077               | -0.175               | 0.252              |
| <b>Naringenin</b>       | 0.860                 | 0.748     | 0.070                | -0.266               | 0.084              |
| <b>Apigenin</b>         | 0.650                 | 0.552     | -0.119               | -0.203               | -0.126             |
| <b>Luteolin</b>         | 0.839                 | 0.510     | -0.091               | -0.294               | 0.259              |
| <b>Catechin</b>         | -0.245                | -0.503    | 0.385                | 0.287                | -0.077             |
| <b>Epicatechin</b>      | 0.035                 | -0.259    | 0.238                | -0.049               | 0.000              |
| <b>Quercetin</b>        | 0.287                 | 0.070     | 0.042                | 0.119                | -0.063             |
| <b>Myricetin</b>        | 0.077                 | 0.427     | 0.098                | 0.028                | 0.021              |
| <b>Quercetin3G</b>      | 0.105                 | 0.448     | 0.119                | -0.748               | 0.420              |
| <b>Quercetagetin7G</b>  | 0.364                 | -0.147    | -0.455               | -0.189               | -0.042             |
| <b>Quercetin34DG</b>    | 0.112                 | 0.650     | 0.748                | -0.259               | 0.175              |
| <b>Rutin</b>            | 0.028                 | 0.490     | 0.664                | -0.280               | 0.014              |
| <b>Kaempferol7G</b>     | 0.769                 | 0.699     | 0.245                | -0.210               | 0.308              |
| <b>Kaempferol3G</b>     | 0.490                 | 0.790     | 0.378                | -0.210               | 0.231              |
| <b>Kaempferol3R</b>     | 0.762                 | 0.706     | 0.406                | 0.126                | -0.028             |
| <b>Tiliroside</b>       | 0.420                 | 0.224     | 0.049                | 0.077                | 0.280              |
| <b>Pinoresinol</b>      | 0.580                 | 0.273     | -0.329               | -0.168               | -0.056             |
| <b>Phloridzin</b>       | 0.720                 | 0.497     | 0.014                | 0.154                | -0.098             |
|                         |                       |           |                      |                      |                    |
|                         | <b>Ripening_index</b> | <b>FW</b> | <b>Pulppit_ratio</b> | <b>Water_content</b> | <b>Oil_content</b> |
| <b>Ripening_index</b>   |                       | 0.427     | -0.028               | -0.098               | 0.070              |
| <b>FW</b>               | 0.427                 |           | 0.343                | -0.350               | 0.175              |
| <b>Pulppit_ratio</b>    | -0.028                | 0.343     |                      | 0.322                | -0.224             |
| <b>Water_content</b>    | -0.098                | -0.350    | 0.322                |                      | -0.580             |
| <b>Oil_content</b>      | 0.070                 | 0.175     | -0.224               | -0.580               |                    |
| <b>3,4-DHPEA-EDA</b>    | -0.671                | -0.287    | 0.021                | -0.322               | 0.357              |
| <b>p-HPEA-EDA</b>       | -0.657                | -0.315    | -0.014               | -0.301               | 0.329              |
| <b>Elenolide</b>        | -0.706                | -0.343    | -0.014               | -0.308               | 0.378              |
| <b>Lutein</b>           | -0.294                | -0.203    | -0.336               | -0.678               | 0.545              |
| <b>bCarotene</b>        | 0.070                 | 0.154     | -0.021               | -0.259               | -0.077             |
| <b>Neoxanthin</b>       | 0.077                 | 0.063     | -0.399               | -0.860               | 0.608              |
| <b>PheophytinA</b>      | 0.671                 | 0.476     | -0.161               | -0.580               | 0.245              |
| <b>ChlorophyllA</b>     | -0.510                | -0.154    | -0.287               | -0.671               | 0.503              |
| <b>Totpigments</b>      | 0.049                 | 0.147     | -0.350               | -0.895               | 0.601              |

**Table S2.** P-values associated to the correlation coefficients shown in Table S1.

|                  | p.Ripening_index | p.FW    | p.Pulppit_ratio | p.Water_content | p.Oil_content |
|------------------|------------------|---------|-----------------|-----------------|---------------|
| Ripening_index   |                  | 0.09934 | 0.74767         | 0.56027         | 0.76491       |
| FW               | 0.09934          |         | 0.37967         | 0.19846         | 0.65824       |
| Pulppit_ratio    | 0.74767          | 0.37967 |                 | 0.13938         | 0.74516       |
| Water_content    | 0.56027          | 0.19846 | 0.13938         |                 | 0.07653       |
| Oil_content      | 0.76491          | 0.65824 | 0.74516         | 0.07653         |               |
| Protocatechuic_a | 0.00041          | 0.21412 | 0.09368         | 0.15136         | 0.60897       |
| Vanillic_a       | 0.04316          | 0.04086 | 0.10787         | 0.83151         | 0.45494       |
| Caffeic_a        | 0.01344          | 0.33130 | 0.82278         | 0.22875         | 0.15419       |
| 4Coumaric_a      | 0.01654          | 0.29448 | 0.45254         | 0.18350         | 0.08246       |
| ferulic_a        | 0.02552          | 0.76741 | 0.11870         | 0.93755         | 0.91909       |
| Chlorogenic_a    | 0.00580          | 0.26507 | 0.52837         | 0.29318         | 0.22343       |
| Chicoric_a       | 0.22905          | 0.92803 | 0.46530         | 0.13670         | 0.05966       |
| Verbascoside     | 0.00523          | 0.34407 | 0.63815         | 0.67545         | 0.21363       |
| p-HPEA           | 0.11341          | 0.75245 | 0.15633         | 0.43579         | 0.76097       |
| 3,4-DHPEA        | 0.00031          | 0.06208 | 0.81467         | 0.46421         | 0.94179       |
| Ligstroside      | 0.08801          | 0.82683 | 0.79600         | 0.10804         | 0.35093       |
| Oleuropein       | 0.00934          | 0.53780 | 0.62222         | 0.41396         | 0.42492       |
| Naringenin       | 0.00002          | 0.02109 | 0.98831         | 0.34459         | 0.67395       |
| Apigenin         | 0.02926          | 0.11580 | 0.26289         | 0.23339         | 0.55771       |
| Luteolin         | 0.00049          | 0.14511 | 0.42445         | 0.24468         | 0.49265       |
| Catechin         | 0.34383          | 0.03869 | 0.30387         | 0.16224         | 0.41255       |
| Epicatechin      | 0.81515          | 0.57714 | 0.44636         | 0.93925         | 0.69540       |
| Quercetin        | 0.98832          | 0.93745 | 0.65829         | 0.91981         | 0.87746       |
| Myricetin        | 0.62141          | 0.58168 | 0.86263         | 0.84988         | 0.82949       |
| Quercetin3G      | 0.76162          | 0.30837 | 0.81904         | 0.00753         | 0.09822       |
| Quercetagetin7G  | 0.11936          | 0.99842 | 0.10322         | 0.40967         | 0.80592       |
| Quercetin34DG    | 0.87302          | 0.04863 | 0.24821         | 0.13708         | 0.45908       |
| Rutin            | 0.97169          | 0.07254 | 0.06329         | 0.28685         | 0.67987       |
| Kaempferol7G     | 0.01335          | 0.01992 | 0.16802         | 0.63474         | 0.29130       |
| Kaempferol3G     | 0.62622          | 0.02105 | 0.55428         | 0.48985         | 0.96970       |
| Kaempferol3R     | 0.00450          | 0.02476 | 0.14641         | 0.95896         | 0.70120       |
| Tiliroside       | 0.13881          | 0.50036 | 0.21513         | 0.77267         | 0.25672       |
| Pinoresinol      | 0.00628          | 0.27294 | 0.12468         | 0.18321         | 0.86143       |
| Phloridzin       | 0.00173          | 0.11175 | 0.77133         | 0.51558         | 0.85380       |
|                  |                  |         |                 |                 |               |
|                  | p.Ripening_index | p.FW    | p.Pulppit_ratio | p.Water_content | p.Oil_content |
| Ripening_index   |                  | 0.09934 | 0.74767         | 0.56027         | 0.76491       |
| FW               | 0.09934          |         | 0.37967         | 0.19846         | 0.65824       |
| Pulppit_ratio    | 0.74767          | 0.37967 |                 | 0.13938         | 0.74516       |
| Water_content    | 0.56027          | 0.19846 | 0.13938         |                 | 0.07653       |
| Oil_content      | 0.76491          | 0.65824 | 0.74516         | 0.07653         |               |
| 3,4-DHPEA-EDA    | 0.16126          | 0.84028 | 0.81981         | 0.03434         | 0.12239       |
| p-HPEA-EDA       | 0.07955          | 0.60135 | 0.62316         | 0.04858         | 0.15581       |
| Elenolide        | 0.02293          | 0.37871 | 0.59347         | 0.10495         | 0.19279       |
| Lutein           | 0.69255          | 0.63969 | 0.02141         | 0.00426         | 0.08367       |
| βCarotene        | 0.78599          | 0.82420 | 0.66391         | 0.51567         | 0.72385       |
| Neoxanthin       | 0.84561          | 0.97908 | 0.07671         | 0.00025         | 0.06776       |
| PheophytinA      | 0.00089          | 0.21166 | 0.08985         | 0.13633         | 0.68977       |
| ChlorophyllA     | 0.04272          | 0.42207 | 0.20896         | 0.04571         | 0.22701       |
| Totpigments      | 0.96270          | 0.99597 | 0.01097         | 0.00036         | 0.12780       |

**Table S3.** Mean values  $\pm$  standard deviations of fruit phenolic compounds (chicoric acid, p-HPEA, catechin, epicatechin, quercetin, myricetin, quercetagenin7G, quercetin3,4DG, kaempferol3G, tiliroside reported as ng g<sup>-1</sup> FW) and pigments ( $\beta$ -Carotene,  $\mu$ g g<sup>-1</sup> oil) in fruits from olive ('cv Arbequina') trees subjected to T1, T2, T3 and T4. Data were analyzed by one-way ANOVA. P-values are reported in the Table. Abbreviations: G=glucoside, DG=diglucoside.

| Compound          | T1                | T2                | T3                | T4                | P-value |
|-------------------|-------------------|-------------------|-------------------|-------------------|---------|
| Chicoric acid     | 48 $\pm$ 11.9     | 146 $\pm$ 85.0    | 66 $\pm$ 47.2     | 126 $\pm$ 47.7    | 0.212   |
| p-HPEA            | 1688 $\pm$ 1472.3 | 919 $\pm$ 1591.4  | nd                | 3879 $\pm$ 1566.7 | 0.055   |
| Catechin          | 131 $\pm$ 60.7    | 120 $\pm$ 37.1    | 143 $\pm$ 38.7    | 105 $\pm$ 3.1     | 0.736   |
| Epicatechin       | 110 $\pm$ 44.7    | 125 $\pm$ 28.2    | 127 $\pm$ 46.5    | 106 $\pm$ 17.1    | 0.897   |
| Quercetin         | 65 $\pm$ 36.8     | 501 $\pm$ 582.4   | 597 $\pm$ 385.8   | 234 $\pm$ 101.6   | 0.359   |
| Myricetin         | 224 $\pm$ 91.4    | 226 $\pm$ 215.8   | 286 $\pm$ 63.6    | 348 $\pm$ 156.5   | 0.741   |
| Quercetagenin7G   | 33 $\pm$ 11.5     | 31 $\pm$ 9.9      | 28 $\pm$ 9.1      | 53 $\pm$ 11.6     | 0.118   |
| Quercetin3,4DG    | 43 $\pm$ 7.8      | 89 $\pm$ 30.3     | 66 $\pm$ 8.1      | 52 $\pm$ 9.4      | 0.053   |
| Kaempferol3G      | 52 $\pm$ 33.5     | 1083 $\pm$ 1606.3 | 1995 $\pm$ 2490.6 | 2004 $\pm$ 2598.4 | 0.712   |
| Tiliroside        | 77 $\pm$ 30.2     | 99 $\pm$ 61.8     | 138 $\pm$ 63.7    | 118 $\pm$ 34.9    | 0.605   |
| $\beta$ -Carotene | 1.3 $\pm$ 0.32    | 1.4 $\pm$ 0.10    | 1.3 $\pm$ 0.14    | 1.3 $\pm$ 0.08    | 0.962   |

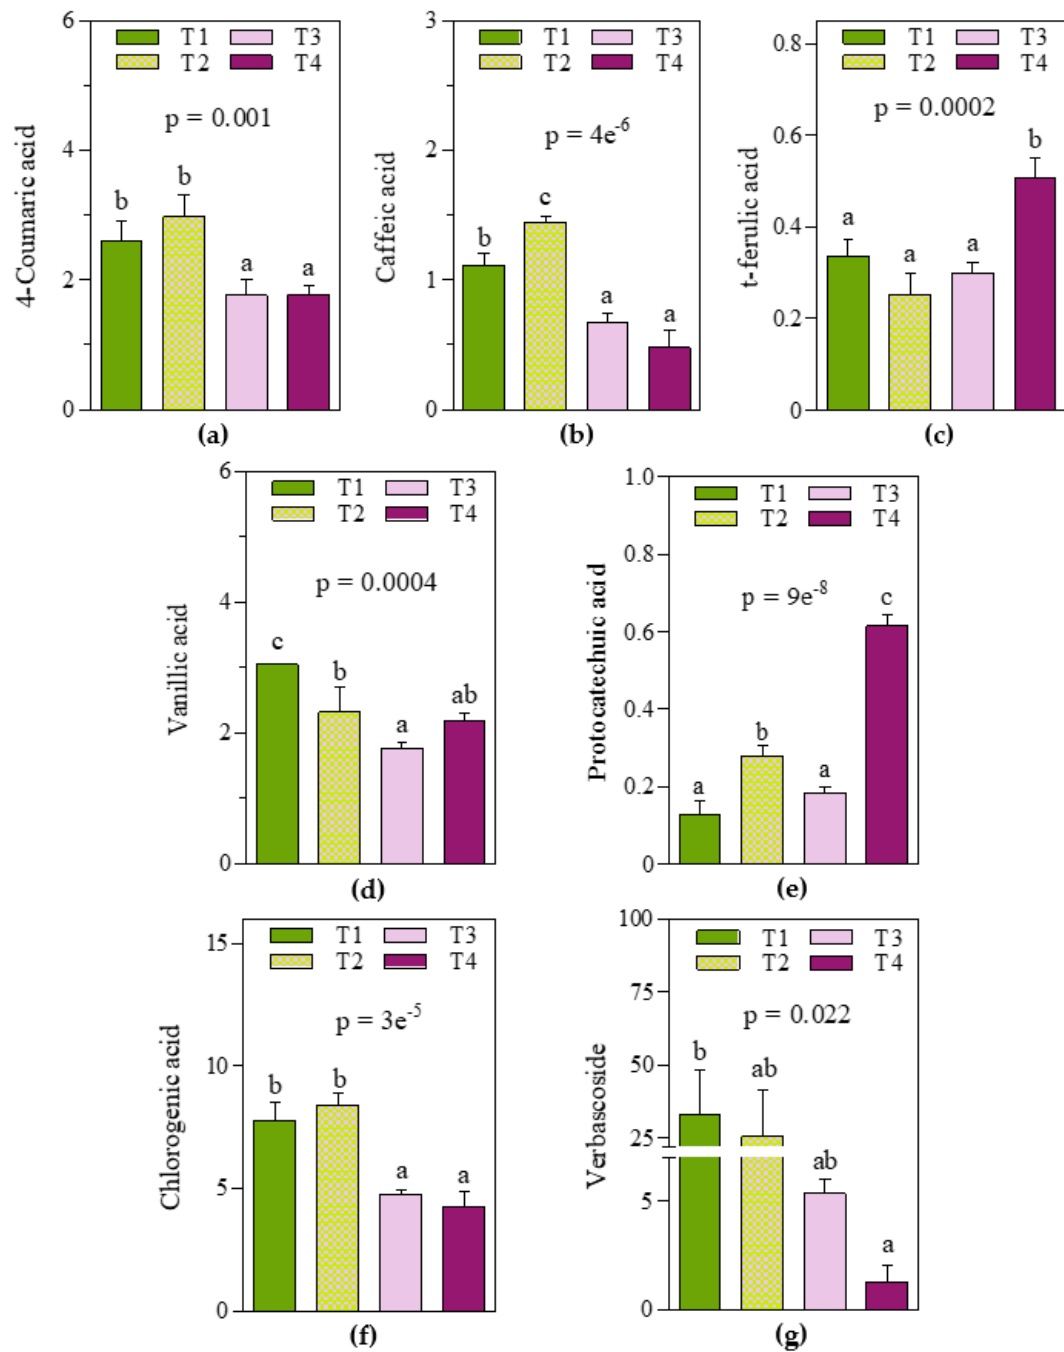

**Figure S5.** Mean values  $\pm$  standard deviations of phenolic acids and derivatives ( $\text{mg kg}^{-1}$  FW): (a) 4-coumaric acid; (b) Caffeic acid; (c) trans-ferulic acid (t-ferulic acid); (d) Vanillic acid; (e) Protocatechuic acid; (f) Chlorogenic acid; (g) Verbascoside in fruits from olive ('cv Arbequina') trees subjected to T1, T2, T3 and T4. Data were analyzed by one-way ANOVA Tukey's post-hoc test at 0.05 probability level was applied and different letters indicated significant difference. P-values are reported in the graphs.

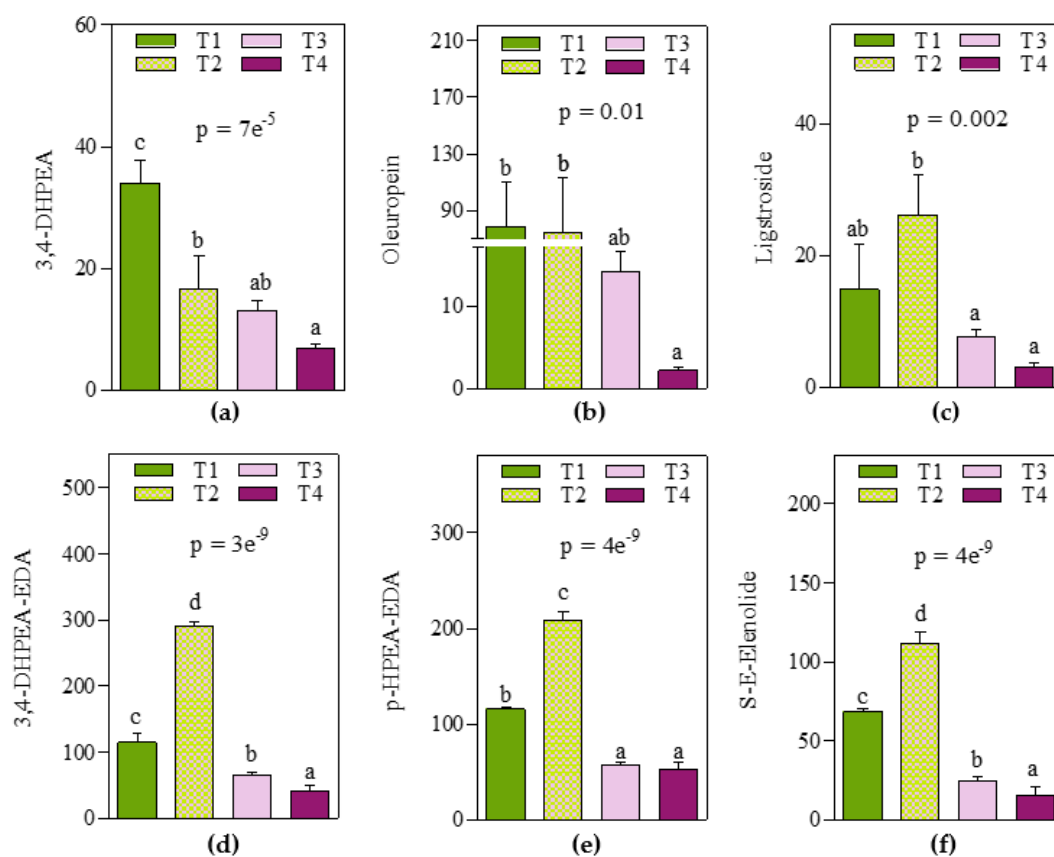

**Figure S6.** Mean values  $\pm$  standard deviations of phenolic alcohols, secoiridoids and derivatives (mg kg<sup>-1</sup> FW): **(a)** 3,4-DHPEA (hydroxytyrosol); **(b)** Oleuropein; **(c)** Ligstroside; **(d)** 3,4-DHPEA-EDA (oleacein); **(e)** p-HPEA-EDA (oleocanthal); **(f)** S-(E)-Elenolide in fruits (**a, b, c**) or in oils (**d, e, f**) from olive ('cv Arbequina') trees subjected to T1, T2, T3 and T4. Data were analyzed by one-way ANOVA Tukey's post-hoc test at 0.05 probability level was applied and different letters indicated significant difference. P-values are reported in the graphs.



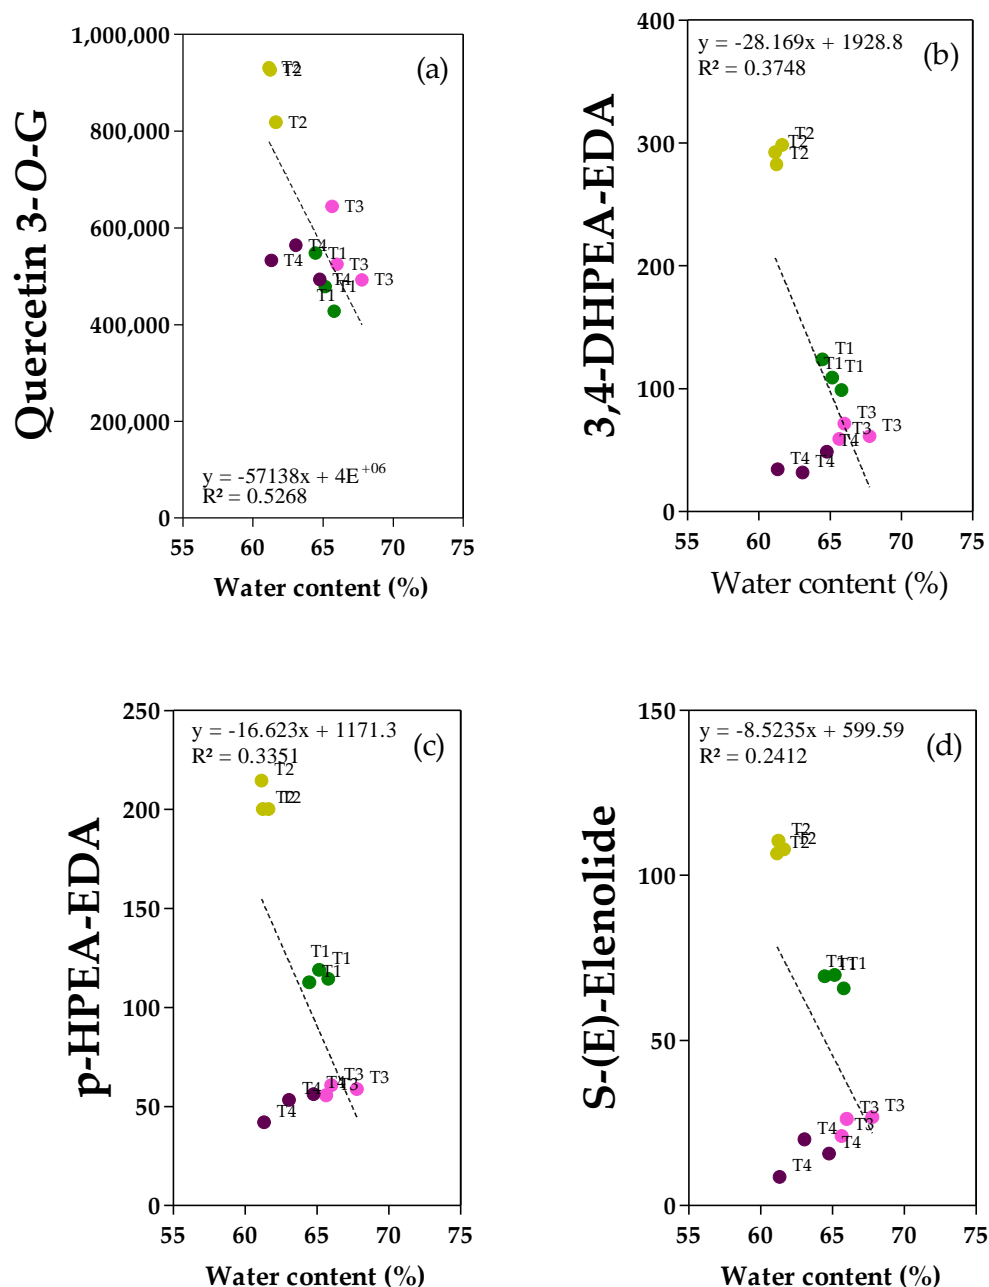

**Figure S7.** Regression analysis between water content (%) and (a) Quercetin-3-O-Glucoside (Quercetin-3-O-G) (ng g<sup>-1</sup> FW) in fruits from olive ('cv Arbequina') trees subjected to T1, T2, T3 and T4; (b) 3,4-DHPEA-EDA, (c) p-HPEA-EDA and (d) S-(E)-Elenolide in oils (mg kg<sup>-1</sup>) from olive ('cv Arbequina') trees subjected to T1 (●) full irrigation with tilled soil, T2 (●) reduced irrigation with tilled soil, T3 (●) full irrigation with non-tilled soil and, T4 (●) reduced irrigation with non-tilled soil.

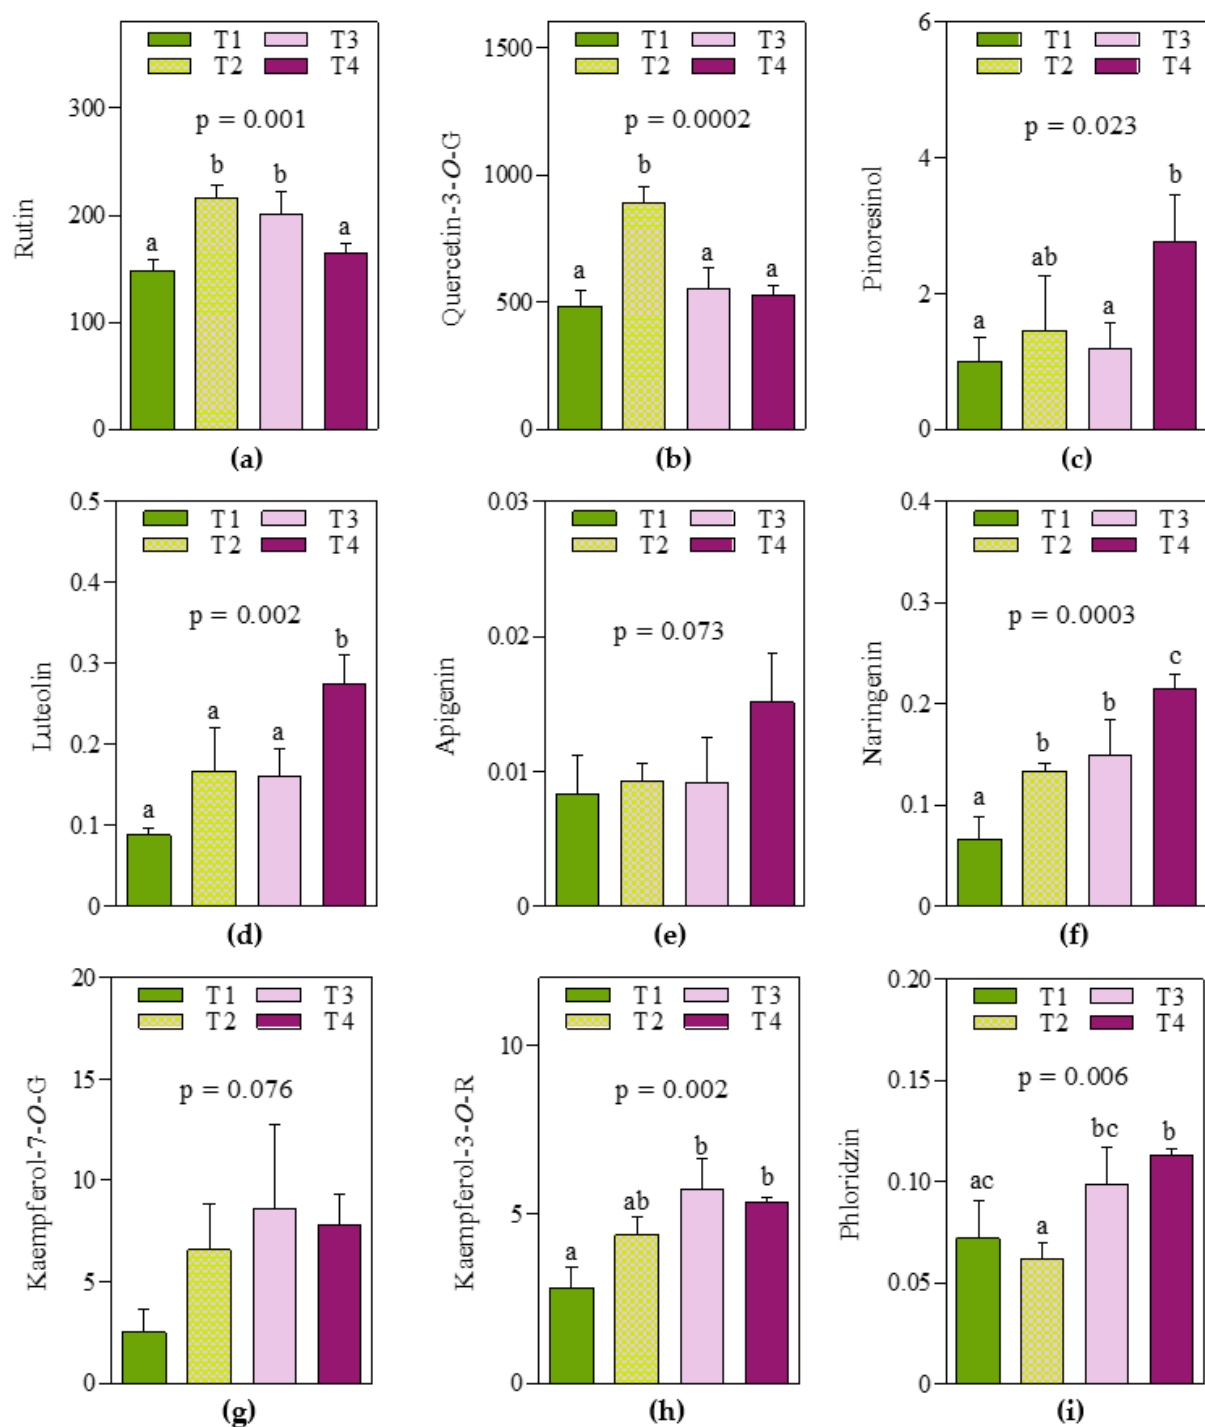

**Figure S8.** Mean values  $\pm$  standard deviations of flavonoids and lignan (mg kg<sup>-1</sup> FW): (a) Rutin; (b) Quercetin-3-O-Glucoside (Quercetin-3-O-G); (c) Pinoresinol; (d) Luteolin; (e) Apigenin; (f) Naringenin; (g) Kaempferol-7-O-Glucoside (Kaempferol-7-O-G); (h) Kaempferol-3-O-Rutinoside (Kaempferol-3-O-R); (i) Phloridzin in fruits from olive ('cv Arbequina') trees subjected to T1, T2, T3 and T4. Data were analyzed by one-way ANOVA Tukey's post-hoc test at 0.05 probability level was applied and different letters indicated significant difference. P-values are reported in the graphs.

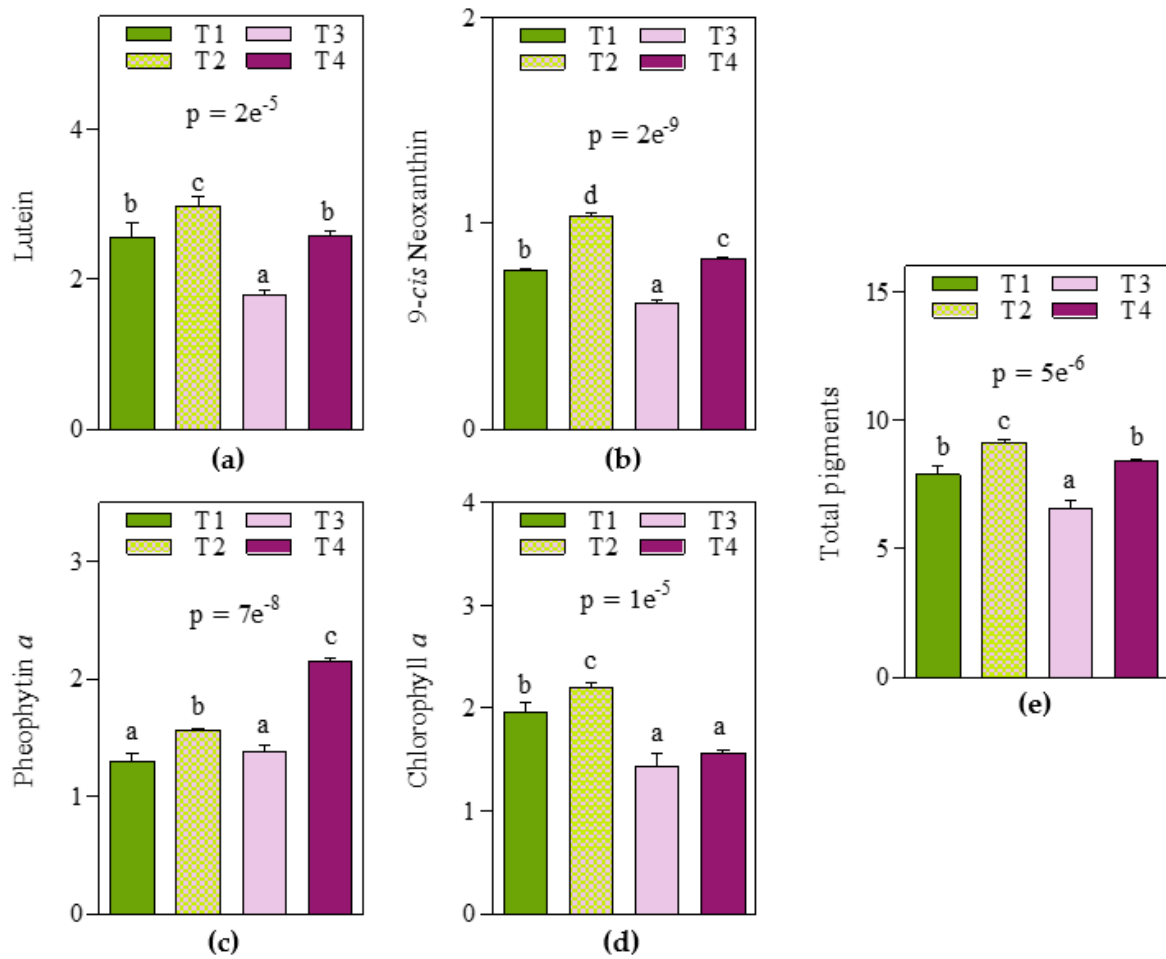

**Figure S9.** Mean values  $\pm$  standard deviations of pigments (mg kg<sup>-1</sup> oil): (a) Lutein; (b) 9-cis Neoxanthin; (c) Pheophytin *a*; (d) Chlorophyll *a*; (e) Total pigments in oils from olive ('cv Arbequina') trees subjected to T1, T2, T3 and T4. Data were analyzed by one-way ANOVA Tukey's post-hoc test at 0.05 probability level was applied and different letters indicated significant difference. P-values are reported in the graphs.

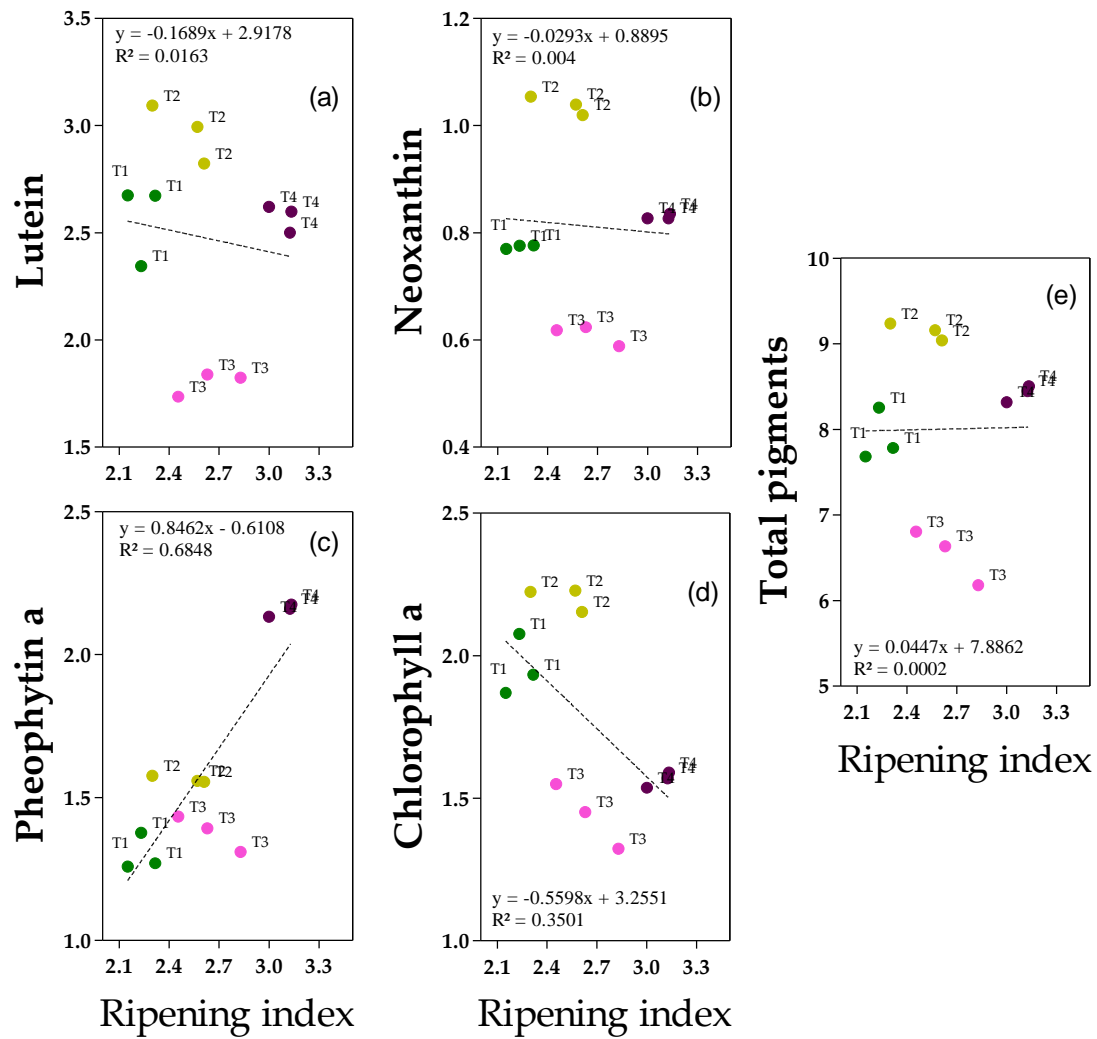

**Figure S10.** Regression analyses between ripening index and (a) lutein; (b) 9-cis neoxanthin (Neoxanthin); (c) pheophytin a; (d) chlorophyll a; (e) total pigments in oils (mg kg<sup>-1</sup> oil) from olive ('cv Arbequina') trees subjected to T1 (●) full irrigation with tilled soil, T2 (●) reduced irrigation with tilled soil, T3 (●) full irrigation with non-tilled soil and, T4 (●) reduced irrigation with non-tilled soil.

## Materials and methods

Common source parameters were as follows: nebulization gas (GS1) 50; turbo gas (GS2) 50; curtain gas (CUR) 10; temperature (TEM) 500 °C; ion-spray voltage (IS) -4500 V, input potential (EP) 10 V. The compound parameters, declustering potential (DP), collision energy (CE) and collision cell exit potential (CXP) were adjusted for the specific selected reaction monitoring transition (SRM) for each component. The SRM transitions and corresponding compound parameters are shown in Table S3.

**Table S4.** SRM transitions and corresponding phenols' parameters.

| Compound Name               | Q1      | Q3      | CE(eV) | CXP(V) | DP(V) |
|-----------------------------|---------|---------|--------|--------|-------|
| 2-Coumaric Acid             | 163     | 119     | -18    | -11    | -65   |
| 3-Coumaric Acid             | 163     | 119     | -18    | -11    | -65   |
| 4-Coumaric Acid             | 163     | 119     | -18    | -11    | -65   |
| Vanillic acid               | 166.9   | 108     | -26    | -13    | -62   |
| Gallic acid                 | 168.9   | 125     | -20    | -13    | -75   |
| Caffeic acid                | 178.9   | 135     | -23    | -11    | -86   |
| Cinnamic acid               | 147     | 103     | -15    | -16    | -65   |
| Protocatechuic acid         | 153     | 109     | -21    | -7     | -86   |
| <i>trans</i> -Ferulic Acid  | 193     | 134     | -20    | -8     | -62   |
| Cynarine                    | 515.1   | 191     | -41    | -7     | -120  |
| Rosmarinic Acid             | 359     | 161     | -22.5  | -10    | -70   |
| Chlorogenic Acid            | 353     | 191     | -24    | -9     | -61   |
| Cichoric Acid               | 473.1   | 149     | -30    | -8     | -76   |
| Verbascoside                | 623.1   | 160.9   | -43    | -7     | -82   |
| Tyrosol                     | 137     | 106     | -22    | -13    | -78   |
| Hydroxytyrosol              | 153     | 123     | -20    | -17    | -100  |
| Ligstroside                 | 523.1   | 291     | -32    | -11.8  | -117  |
| Oleuropein                  | 539.1   | 275     | -32    | -12    | -137  |
| Quercetin                   | 301     | 150.9   | -38    | -8     | -113  |
| Quercetin 3-O-Glucoside     | 463.1   | 300     | -37    | -5     | -154  |
| Quecetin-3,4-O-DiGlucoside  | 625.1   | 270.9   | -85    | -12    | -178  |
| Rutin                       | 609.2   | 299.9   | -48    | -11    | -154  |
| Quercetagetin 7-O-Glucoside | 479.1   | 316.9   | -31    | -14    | -152  |
| Myricetin                   | 316.9   | 150.9   | -33    | -9     | -125  |
| Kaempferol 3-O-rutinoside   | 593.2   | 284.9   | -40    | -5     | -138  |
| Kaempferol 7-O-glucoside    | 447.1   | 284.9   | -38    | -5     | -158  |
| Kaempferol 3-O-glucoside    | 447.1   | 284.1   | -39    | -11    | -202  |
| Tiliroside                  | 593.201 | 284.901 | -40    | -5     | -138  |
| Naringenin                  | 270.9   | 150.9   | -25    | -10.5  | -120  |
| Apigenin                    | 268.9   | 117     | -49    | -14    | -120  |
| Luteolin                    | 284.9   | 133     | -44.6  | -17.4  | -130  |
| Pinoresinol                 | 357     | 151     | -26    | -7     | -97   |
| Catechin                    | 289     | 244.9   | -22    | -11    | -108  |
| Epicatechin                 | 289.001 | 244.901 | -22    | -11    | -108  |
| Procyanidin B1              | 577.1   | 289     | -35    | -11    | -156  |
| Procyanidin B2              | 577.1   | 289     | -35    | -11    | -156  |
| Procyanidin B3              | 577.1   | 289     | -35    | -11    | -156  |
| Piceid                      | 389.1   | 227     | -32    | -11    | -125  |
| Resveratrol                 | 227.1   | 185     | -25    | -9     | -179  |
| Phloretin                   | 273     | 167     | -38    | -11    | -103  |
| Phloridzin                  | 435.1   | 272.9   | -23    | -5     | -135  |
